# Supplementary material for: Microstructured macroporous adsorbent composed of polypyrrole modified natural corncob-core sponge for Cr(vi) removal
Source: Royal Society of Chemistry journal article supplement (doi:10.1039/c6ra07687d), 2016-01-01
Supplement: c6ra07687d1.pdf [file c6ra07687d1.pdf]

## Microstructured Macroporous Adsorbent Composed of Polypyrrole Modified Natural Corncob-core Sponge for Cr(VI) Removal

Jianqiao Zhang<sup>&</sup>, Huan Chen<sup>&</sup>, Zi Chen, Jiaojie He, Wenxin Shi, Dongmei Liu, Huizhong Chi, Fuyi Cui, Wei Wang\*

State Key Laboratory of Urban Water Resource and Environment (SKLUWRE), School of Municipal and Environmental Engineering, Harbin Institute of Technology, Harbin 150090, P.R. China, Email: wangweirs@hit.edu.cn

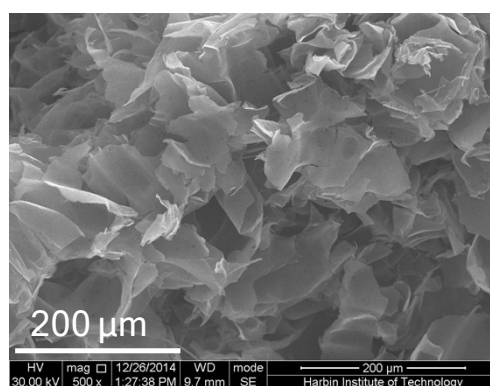

Figure S1. SEM of pure corncob-core, which is composed of quasi-two dimensional microsheets.

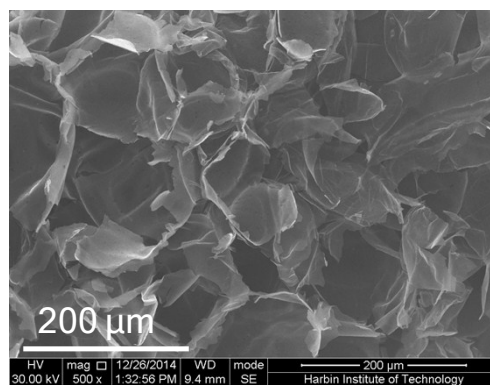

Figure S2. A FE-SEM image of the as-prepared CC-PPy. There is no PPy particles emerged in the sponge pores, indicating that PPy grew along the corncob-core micro-sheets.

Table S1. The PPy loading of the three composite CC-PPy samples demonstrated in Figure 4b.

| mass ratio between | 1:2 | 1:1 | 2:1 |
|--------------------|-----|-----|-----|
|--------------------|-----|-----|-----|

|                                |          |          |          |
|--------------------------------|----------|----------|----------|
| Py to CC during polymerization |          |          |          |
| PPy                            | 0.4424 g | 0.7120 g | 1.2162 g |
| CC                             | 0.4082 g | 0.4091 g | 0.4207 g |
| CC-PPy                         | 0.8506 g | 1.1211 g | 1.6369 g |
| Loading ratio                  | 52%      | 64%      | 74%      |

Table S2. Kinetics parameters for Cr(VI) adsorption onto the CC-PPy sponges.

| Concentration of Cr(VI) ions (mg/L) | pseudo-first-order | Pseudo-second-order |                                                      |
|-------------------------------------|--------------------|---------------------|------------------------------------------------------|
|                                     | $R^2$              | $R^2$               | $k_2(\text{g} \cdot \text{mg}^{-1} \text{min}^{-1})$ |
| 50                                  | 0.7225             | 0.998               | 0.0023                                               |
| 100                                 | 0.4473             | 0.995               | 0.0005                                               |
| 150                                 | 0.5826             | 0.994               | 0.0002                                               |
| 200                                 | 0.5094             | 0.992               | 0.0001                                               |

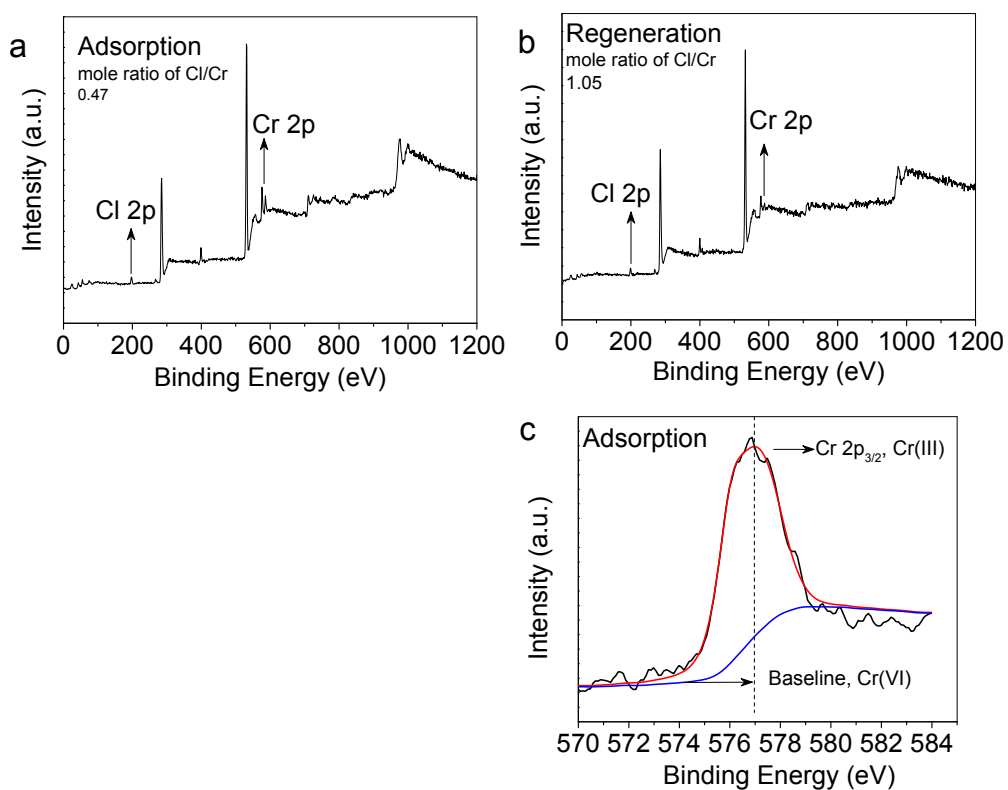

Figure S3. XPS survey-spectra of CC-PPy after adsorption (a) and after adsorption followed by regeneration (b); wide scan of Cr 2p<sub>3/2</sub> for the sample after regeneration (c).

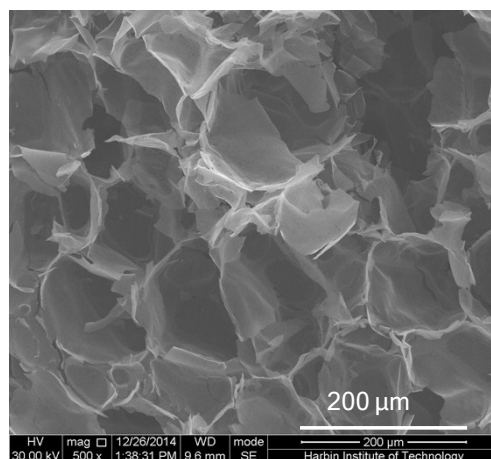

Figure S4. SEM of CC-PPy after adsorption of Cr(VI).
